# Supplementary material
Source: publisher figshare collection journal article supplement (https://gsajournals.figshare.com/ndownloader/files/20021765)
Supplement: Supplementary file 1 [file 20021765]

## Sheet: Sheet1
Supplementary Table 2. Mean and standard deviation for all 17 traits in male subjects grouped by BMI and WC categories.
		BMI category
Clinical trait		Thin		Normal			Overweight			Obese
		WC < 85		WC < 85	85 ≤ WC		WC < 85	85 ≤ WC		85 ≤ WC
n		102		2223	753		181	1453		195
Age (years)		58.5 (± 13.27)		62.1 (± 10.61)	63.6 (± 8.67)		61.1 (± 10.97)	63 (± 9.45)		57.3 (± 12.33)
SBP (mmHg)		122.8 (± 18.42)		128.6 (± 17.45)	129.9 (± 17.36)		131.6 (± 17.57)	132.6 (± 16.38)		134.7 (± 16.44)
DBP (mmHg)		75.6 (± 10.42)		77.3 (± 9.8)	78.7 (± 10.16)		79.1 (± 10.35)	80.4 (± 9.96)		81.8 (± 10.07)
TG (mg/dl)		96.2 (± 64.45)		124.3 (± 75.13)	151.6 (± 90.28)		162.6 (± 117.85)	165.7 (± 92.31)		186.3 (± 100.64)
HDL-C (mg/dl)		71.2 (± 19.33)		62.4 (± 16.77)	55.9 (± 14.58)		56.9 (± 15.56)	53 (± 13.58)		48.7 (± 11.57)
ht (cm)		166 (± 6.52)		164.5 (± 6.26)	167.9 (± 6.04)		161.1 (± 6.28)	165.2 (± 6.24)		166.3 (± 6.79)
wt (kg)		48.9 (± 4.27)		59.7 (± 5.79)	67 (± 5.02)		66.9 (± 5.33)	73.7 (± 6.55)		88.9 (± 8.91)
BMI (kg/m2)		17.7 (± 0.67)		22 (± 1.59)	23.8 (± 0.92)		25.8 (± 0.69)	27 (± 1.33)		32.1 (± 2.08)
WC (cm)		68.7 (± 3.8)		78.7 (± 4.47)	87.9 (± 2.48)		82.7 (± 1.95)	92.3 (± 4.34)		103.5 (± 6.98)
WHtR		0.414 (± 0.022)		0.479 (± 0.031)	0.524 (± 0.021)		0.514 (± 0.021)	0.559 (± 0.028)		0.623 (± 0.042)
uCre (g/l)		1.15 (± 0.65)		1.038 (± 0.61)	1.046 (± 0.58)		1.084 (± 0.7)	1.083 (± 0.61)		1.126 (± 0.66)
uCl (g/l)		5.24 (± 2.13)		5.31 (± 2.1)	5.54 (± 2.16)		5.45 (± 2.17)	5.56 (± 2.01)		5.74 (± 2.13)
uK (g/l)		1.68 (± 1.04)		1.7 (± 1)	1.69 (± 0.97)		1.74 (± 1.07)	1.73 (± 0.96)		1.68 (± 0.9)
CysC (mg/l)		0.81 (± 0.12)		0.798 (± 0.15)	0.825 (± 0.16)		0.783 (± 0.14)	0.847 (± 0.19)		0.869 (± 0.16)
SCre (mg/dl)		0.769 (± 0.14)		0.802 (± 0.14)	0.812 (± 0.15)		0.815 (± 0.16)	0.836 (± 0.17)		0.834 (± 0.15)
SUA (mg/dl)		5.35 (± 1.24)		5.66 (± 1.23)	5.92 (± 1.36)		5.85 (± 1.2)	6.06 (± 1.31)		6.42 (± 1.35)
BUN (mg/dl)		15.14 (± 3.85)		16.12 (± 4.13)	16.08 (± 4.13)		16.12 (± 3.7)	16.52 (± 4.24)		15.73 (± 4.28)
Hb (g/dl)		14.55 (± 1.19)		14.57 (± 1.18)	14.8 (± 1.13)		14.75 (± 1.03)	14.97 (± 1.19)		15.3 (± 1.17)
BMI, body mass index; BUN, blood urea nitrogen; CysC, cystatin C; DBP, diastolic blood pressure; Hb, Hemoglobin; HDL-C, high-density lipoprotein cholesterol; ht, height; n, number of individuals; SBP, systolic blood pressure; SCre, serum creatinine; SUA, serum uric acid; TG, triglycerides; uCl, urine chloride; uCre, urine creatinine; uK, urine potassium; WC, waist circumference; WHtR, waist-to-he…
